# Supplementary material
Source: PubMed Central journal article supplement (PMC2669027)

**Supplementary Figure 1.** Absence of strong genetic interactions between *ulp2 $\Delta$ C* and *sir2 $\Delta$* . Fivefold serial dilutions of the four haploid segregants from a tetratype tetrad derived from the doubly heterozygous diploid MHY5217 (*ULP2/ulp2 $\Delta$ C341-13myc::his5+ SIR2/sir2 $\Delta$ ::kanMX*) were spotted onto YPD plates and grown at the indicated temperatures. Cells were photographed after 2 days of growth.

**Supplementary Figure 2.** Effects of high-level expression of the NTD, CTD and full-length Ulp2 in WT cells. (A) Anti-Flag immunoblot of whole cell lysates from a wild type (W303) yeast strain containing the indicated plasmids. The NTD (amino acids 1-403), CTD (amino acids 667-1034) and full length Ulp2 were N-terminally Flag-tagged. These alleles were expressed from a galactose-inducible promoter in pRS424. Anti-Pgk1 immunoblotting was used as a loading control. (B) Fivefold serial dilutions of yeast cultures were spotted onto Trp- plates containing either glucose or galactose and grown at 30°C for 4 days. (C) Anti-SUMO immunoblot of whole cell lysates from the indicated strains.

Supplementary Figure 1  
Kroetz et al.

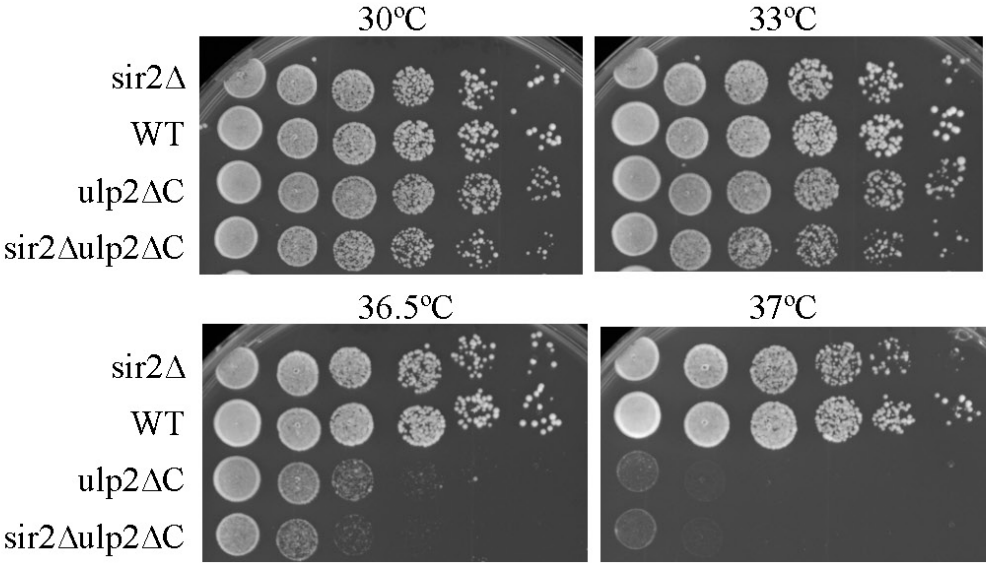

**A.**

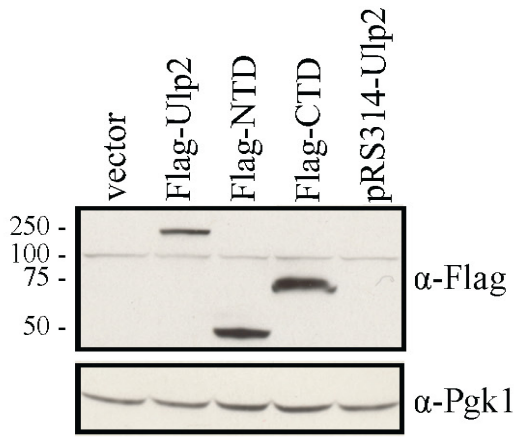

**B.**

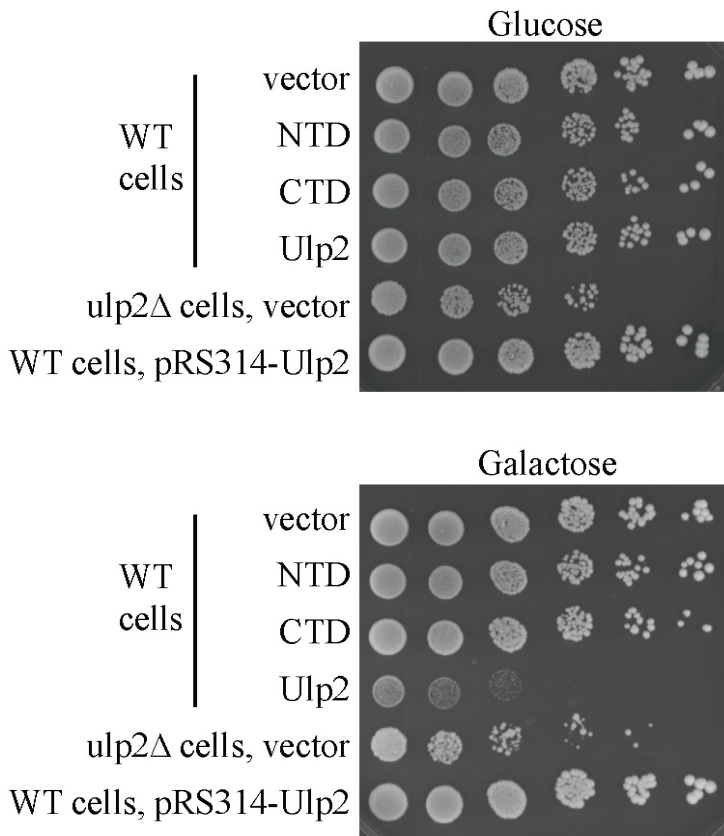

**C.**

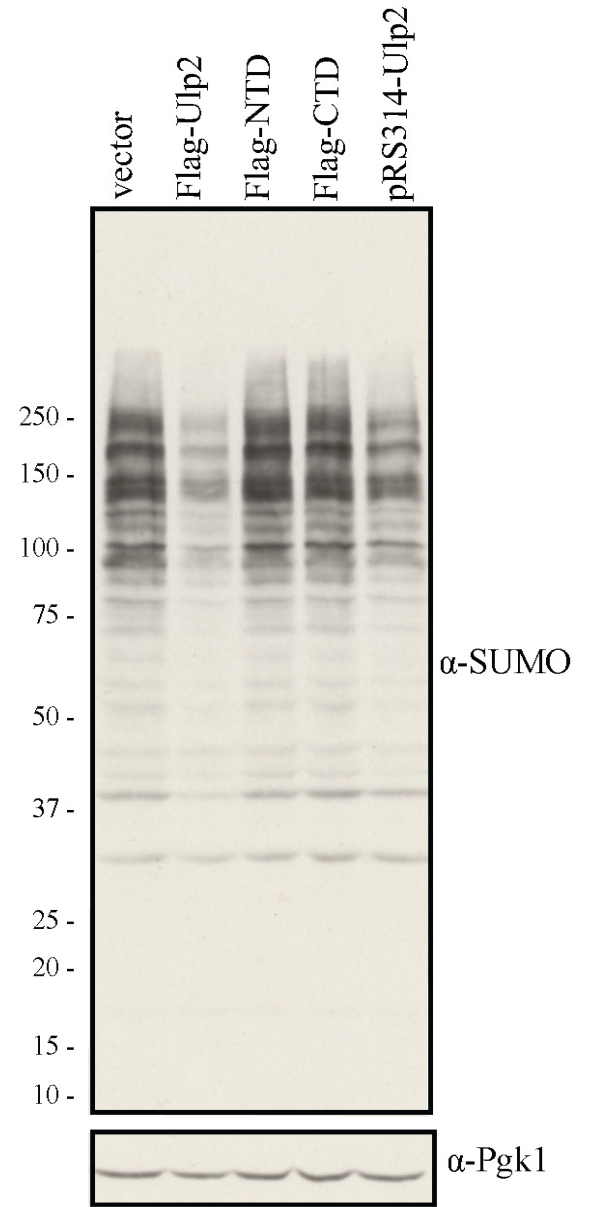

Supplement: E08-10-1090_1.pdf [file E08-10-1090_1.pdf]
